# Supplementary material
Source: MDPI journal article supplement (https://www.mdpi.com/2073-8994/14/4/679)
Supplement: s1 [file s1]

# How symmetry influences the dissociation of protonated cyclic peptides.

Ariel F. Pérez-Mellor,<sup>a), b), #</sup> Riccardo Spezia<sup>b)\*</sup> Anne Zehnacker,<sup>a)\*</sup>

*a) Université Paris-Saclay, CNRS, Institut des Sciences Moléculaires d'Orsay, 91405, Orsay, France*

*b) Laboratoire de Chimie Théorique, Sorbonne Université, UMR 7616 CNRS, 4, Place Jussieu, 75005 Paris, France.*

## Supporting Information.

---

\* Corresponding authors : [anne.zehnacker-rentien@universite-paris-saclay.fr](mailto:anne.zehnacker-rentien@universite-paris-saclay.fr)  
[riccardo.spezia@sorbonne-universite.fr](mailto:riccardo.spezia@sorbonne-universite.fr)

# Current affiliation: Department of Physical Chemistry, University of Geneva, Switzerland.

Table S1 Details of the simulation.  $\Lambda$  is the total integration time,  $N$  the number of trajectories,  $E_v$ , the initial excess vibrational energy,  $\langle K \rangle^{SP}$  the average kinetic energy of the starting point state and their corresponding standard deviations  $\sigma_{\langle K \rangle}$ .  $T^{SP}$  corresponds to the temperature computed from  $\langle K \rangle^{SP}$ .

|                            | $\Lambda$ | $N$   | $E_v$ | $\langle K \rangle^{SP}$<br>kcal/mol | $\sigma_{\langle K \rangle}$ | $T^{SP}$<br>K |
|----------------------------|-----------|-------|-------|--------------------------------------|------------------------------|---------------|
| cycloTyr-ProH <sup>+</sup> | 20ps      | 4992  | 367   | 180                                  | 18                           | 888           |
|                            |           | 4963  | 392   | 192                                  | 19                           | 947           |
|                            |           | 4905  | 417   | 204                                  | 21                           | 1007          |
|                            |           | 4784  | 442   | 216                                  | 22                           | 1067          |
|                            |           | 3722  | 467   | 229                                  | 23                           | 1128          |
|                            |           | 4275  | 492   | 241                                  | 24                           | 1187          |
|                            |           | 3140  | 517   | 253                                  | 26                           | 1248          |
| cycloPhe-HisH <sup>+</sup> | 25ps      | 4923  | 467   | 226                                  | 22                           | 1052          |
|                            |           | 4898  | 492   | 238                                  | 23                           | 1108          |
|                            |           | 11891 | 517   | 250                                  | 25                           | 1164          |
|                            |           | 4633  | 542   | 262                                  | 26                           | 1220          |
|                            |           | 8862  | 567   | 274                                  | 27                           | 1276          |
|                            |           | 4051  | 592   | 286                                  | 28                           | 1333          |
|                            |           | 3613  | 617   | 298                                  | 29                           | 1388          |

Table S2 Microcanonical rate constants and their corresponding uncertainty extracted from chemical dynamics simulations by a simultaneous fit approach using the three-state model.  $\chi^2_{red}$  is the reduced chi-square per degree of freedom evaluating the quality of the fit.

|                            | T <sup>SP</sup><br>K | k <sub>IS</sub>                   | ek <sub>IS</sub> | k <sub>SI</sub> | ek <sub>SI</sub> | k <sub>PI</sub> | ek <sub>PI</sub> | k <sub>PS</sub> | ek <sub>PS</sub> | $\chi^2_{red}$ |
|----------------------------|----------------------|-----------------------------------|------------------|-----------------|------------------|-----------------|------------------|-----------------|------------------|----------------|
|                            |                      | 10 <sup>-5</sup> fs <sup>-1</sup> |                  |                 |                  |                 |                  |                 |                  |                |
| cycloTyr-ProH <sup>+</sup> | 888                  | 1.728                             | 0.008            | 0.699           | 0.071            | 2.163           | 0.057            | 0.181           | 0.005            | 0.39           |
|                            | 947                  | 2.998                             | 0.012            | 1.556           | 0.059            | 2.926           | 0.053            | 0.452           | 0.007            | 0.61           |
|                            | 1007                 | 4.970                             | 0.016            | 0.530           | 0.045            | 5.016           | 0.048            | 0.868           | 0.011            | 0.91           |
|                            | 1067                 | 7.786                             | 0.023            | 0.808           | 0.041            | 7.598           | 0.046            | 1.480           | 0.016            | 0.79           |
|                            | 1128                 | 12.230                            | 0.049            | 2.192           | 0.058            | 10.759          | 0.067            | 2.693           | 0.034            | 1.52           |
|                            | 1187                 | 14.824                            | 0.075            | 0.927           | 0.064            | 12.845          | 0.089            | 5.583           | 0.059            | 3.00           |
|                            | 1248                 | 21.755                            | 0.145            | 1.318           | 0.092            | 18.444          | 0.129            | 7.190           | 0.108            | 3.84           |
| cycloPhe-HisH <sup>+</sup> | 1052                 | 2.640                             | 0.028            | 5.643           | 0.177            | 5.446           | 0.106            | 0.190           | 0.012            | 4.60           |
|                            | 1108                 | 3.574                             | 0.030            | 4.639           | 0.134            | 6.080           | 0.094            | 0.412           | 0.015            | 4.32           |
|                            | 1164                 | 4.794                             | 0.035            | 3.859           | 0.115            | 8.146           | 0.093            | 0.696           | 0.020            | 9.23           |
|                            | 1220                 | 6.113                             | 0.051            | 3.119           | 0.129            | 10.286          | 0.114            | 1.071           | 0.031            | 5.15           |
|                            | 1276                 | 7.990                             | 0.073            | 3.513           | 0.146            | 12.645          | 0.136            | 1.867           | 0.046            | 11.39          |
|                            | 1333                 | 10.726                            | 0.120            | 5.167           | 0.200            | 15.352          | 0.180            | 2.972           | 0.073            | 7.14           |
|                            | 1388                 | 12.658                            | 0.177            | 3.461           | 0.238            | 18.858          | 0.241            | 4.393           | 0.112            | 9.79           |

Table S3 Effective frequencies factors (in fs<sup>-1</sup>) and energy thresholds (in kcal/mol) extracted from a fit using the RRK model.

|            | cycloTyr-ProH <sup>+</sup> | cycloPhe-HisH <sup>+</sup> |
|------------|----------------------------|----------------------------|
| $\nu^{IS}$ | 0.085 ± 0.015              | 0.016 ± 0.002              |
| $E_a^{IS}$ | 29.660 ± 0.695             | 13.423 ± 0.340             |
| $\nu^{PI}$ | 0.031 ± 0.008              | 0.011 ± 0.002              |
| $E_a^{PI}$ | 25.627 ± 1.157             | 11.347 ± 0.467             |
| $\nu^{PS}$ | 0.427 ± 0.182              | 0.499 ± 0.117              |
| $E_a^{PS}$ | 42.404 ± 1.755             | 25.561 ± 0.580             |

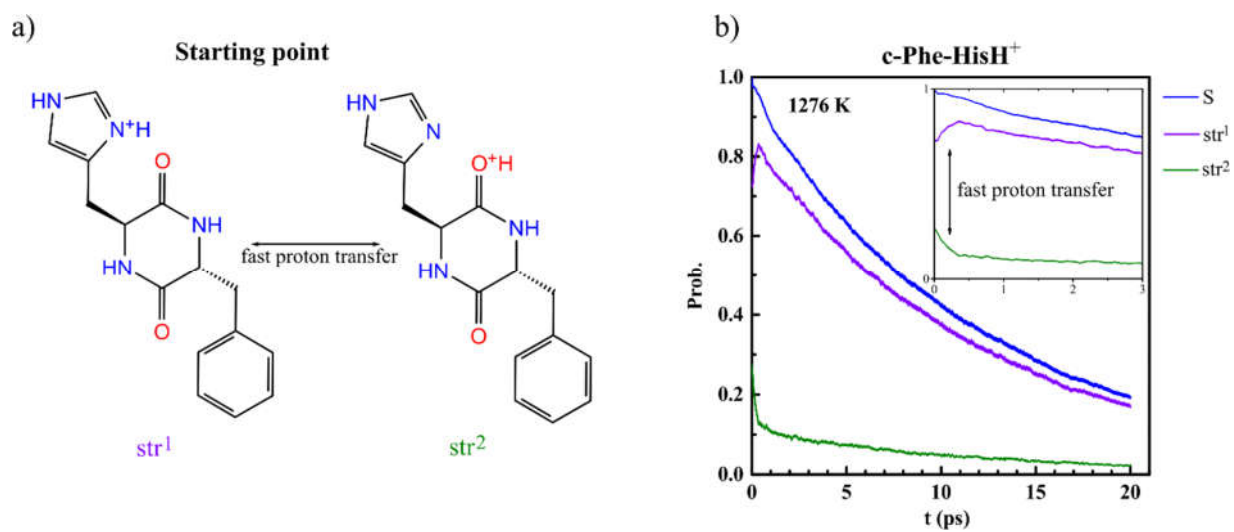

Figure S1 a) Starting point definition ( $S = \text{str}^1 + \text{str}^2$ ) in c-Phe-HisH<sup>+</sup> system due to the fast proton transfer detected during the chemical dynamics simulations. b) Starting point population at 1276 K decomposed into its components. The inset highlights the fast proton transfer that takes place within 1 ps.
